# Supplementary material for: Carbohydrate pellets to assess insulin dysregulation in horses
Source: PubMed Central journal article supplement — J Vet Intern Med. 2022 Dec 30;37(1):302–14. doi: 10.1111/jvim.16621 (PMC9889680; doi:10.1111/jvim.16621), 2022-12-30
Supplement: JVIM-37-302-s001.pdf [file JVIM-37-302-s001.pdf]

**Supporting Information Item 1:** Horses and ponies ( $n = 157$ ) used to test a glycemic pellet comprised 31 different breeds that were classified as prone to Equine Metabolic Syndrome (EMS) or not.

| <b>Breed</b>                  | <b>Number</b> | <b>EMS prone?</b> | <b>Breed (con't)</b>   | <b>Number</b> | <b>EMS prone?</b> |
|-------------------------------|---------------|-------------------|------------------------|---------------|-------------------|
| <b>Appaloosa</b>              | 4             | Y                 | <b>Icelandic Horse</b> | 13            | Y                 |
| <b>Arabian</b>                | 2             | N                 | <b>Irish Draft</b>     | 1             | Y                 |
| <b>Australian Stock Horse</b> | 2             | N                 | <b>Mecklenburger</b>   | 1             | N                 |
| <b>Australian Riding Pony</b> | 5             | Y                 | <b>Miniature Horse</b> | 2             | Y                 |
| <b>Belgian Draft</b>          | 1             | N                 | <b>Morgan</b>          | 6             | N                 |
| <b>British SH</b>             | 1             | N                 | <b>Oldenburger</b>     | 2             | N                 |
| <b>Clydesdale</b>             | 2             | N                 | <b>Percheron</b>       | 2             | N                 |
| <b>Cob</b>                    | 8             | Y                 | <b>Przewalski</b>      | 1             | Y                 |
| <b>Connemara Pony</b>         | 2             | Y                 | <b>Quarter Horse</b>   | 8             | Y                 |
| <b>Danish Warmblood</b>       | 1             | N                 | <b>Shetland pony</b>   | 16            | Y                 |
| <b>Fjord</b>                  | 2             | Y                 | <b>Standardbred</b>    | 24            | N                 |
| <b>Friesian</b>               | 2             | Y                 | <b>Thoroughbred</b>    | 6             | N                 |
| <b>German Riding Pony</b>     | 6             | Y                 | <b>Warmblood</b>       | 1             | Y                 |
| <b>Haflinger</b>              | 1             | N                 | <b>Welsh</b>           | 14            | Y                 |
| <b>Hanoverian</b>             | 16            | N                 | <b>Westphalian</b>     | 1             | N                 |
| <b>Holsteiner</b>             | 1             | Y                 | <b>Other</b>           | 3             |                   |

**Key:** Y, yes; N, no

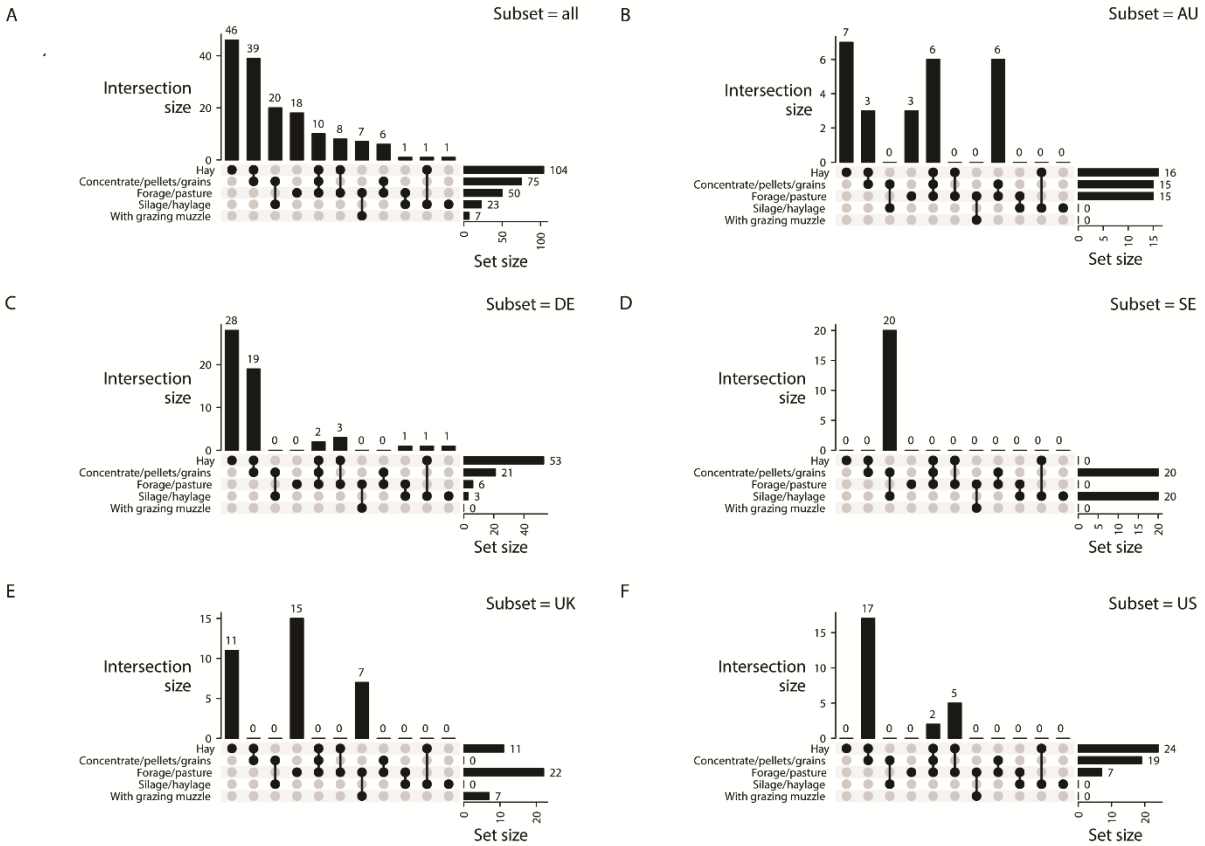

**Supporting Information Item 2.** Horses and ponies (A;  $n = 157$ ) undergoing and oral glycemc challenge in 5 locations (Australia (B), Germany (C), Sweden (D), United Kingdom (E), USA (F)) had been receiving a diet that differed between locations but contained some form of forage (hay > forage/pasture > silage/haylage) as the principal dietary component, and possibly also concentrated feed. Access to pasture was with grazing muzzle in some individuals.

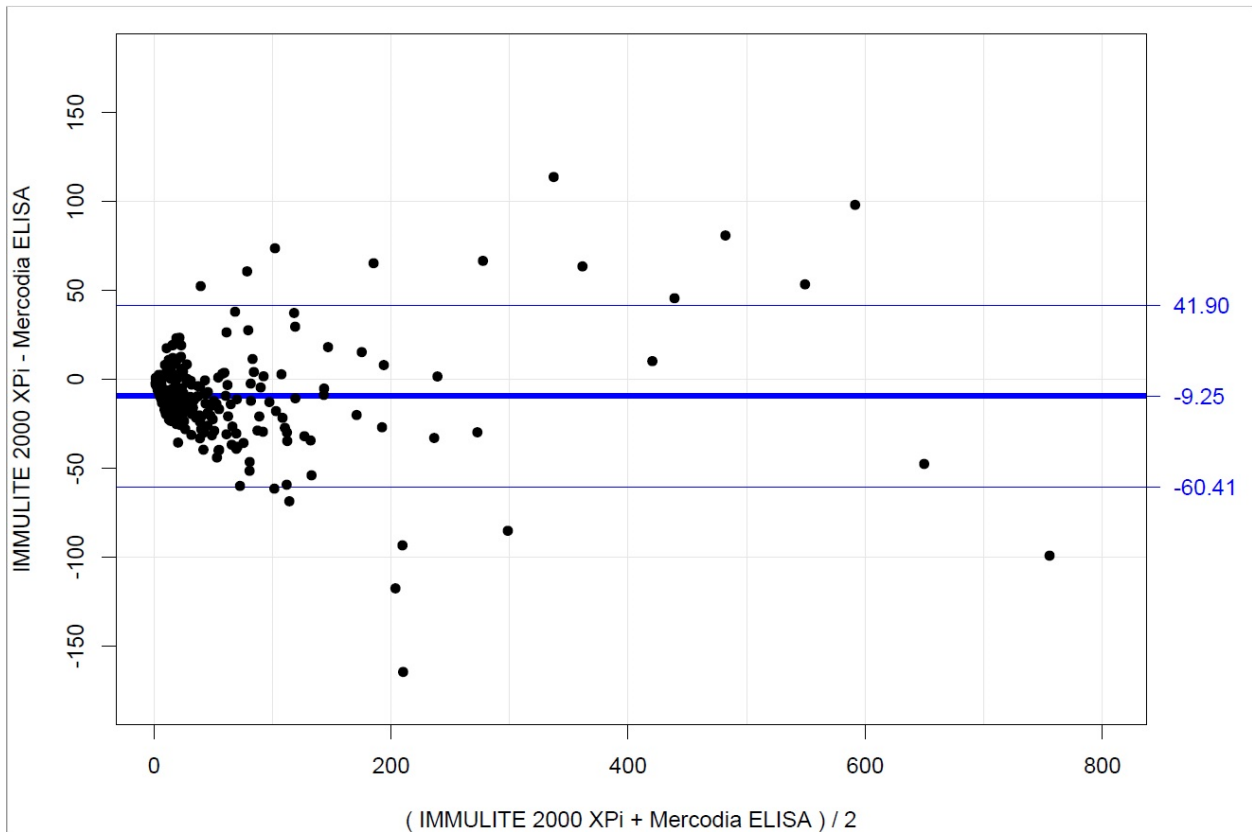

**Supporting Information Item 3.** A Bland-Altman plot showing the limits of agreement between the IMMULITE 200XPi and Mercodia Equine Insulin Assay for the analysis of serum insulin concentration in horses and ponies ( $n = 300$ ).
